# Supplementary material
Source: MDPI journal article supplement (https://www.mdpi.com/2071-1050/15/14/11474)
Supplement: s1 [file s1]

## Supplementary data

# Ball-mill, humic acid and rock phosphate modified conocarpus biochar for efficient removal of heavy metals from contaminated water

Mansour S. AL-Hawas<sup>1</sup>, Muhammad Imran Rafique<sup>1</sup>, Munir Ahmad<sup>1,\*</sup>, Mohammad I. Al-Wabel<sup>1,\*</sup>, Adel R. A. Usman<sup>2</sup>, Hamed Ahmed Al-Swadi<sup>1</sup>, Abdullah S. Al-Farraj<sup>1</sup>

<sup>1</sup> Soil Sciences Department, College of Food & Agricultural Sciences, King Saud University, P.O. Box 2460, Riyadh 11451, Kingdom of Saudi Arabia

<sup>2</sup> Department of Soils and Water, Faculty of Agriculture, Assiut University, Assiut 71526, Egypt

\* Correspondence: amunir@ksu.edu.sa (M.A); malwabel@ksu.edu.sa (M.I.A.)

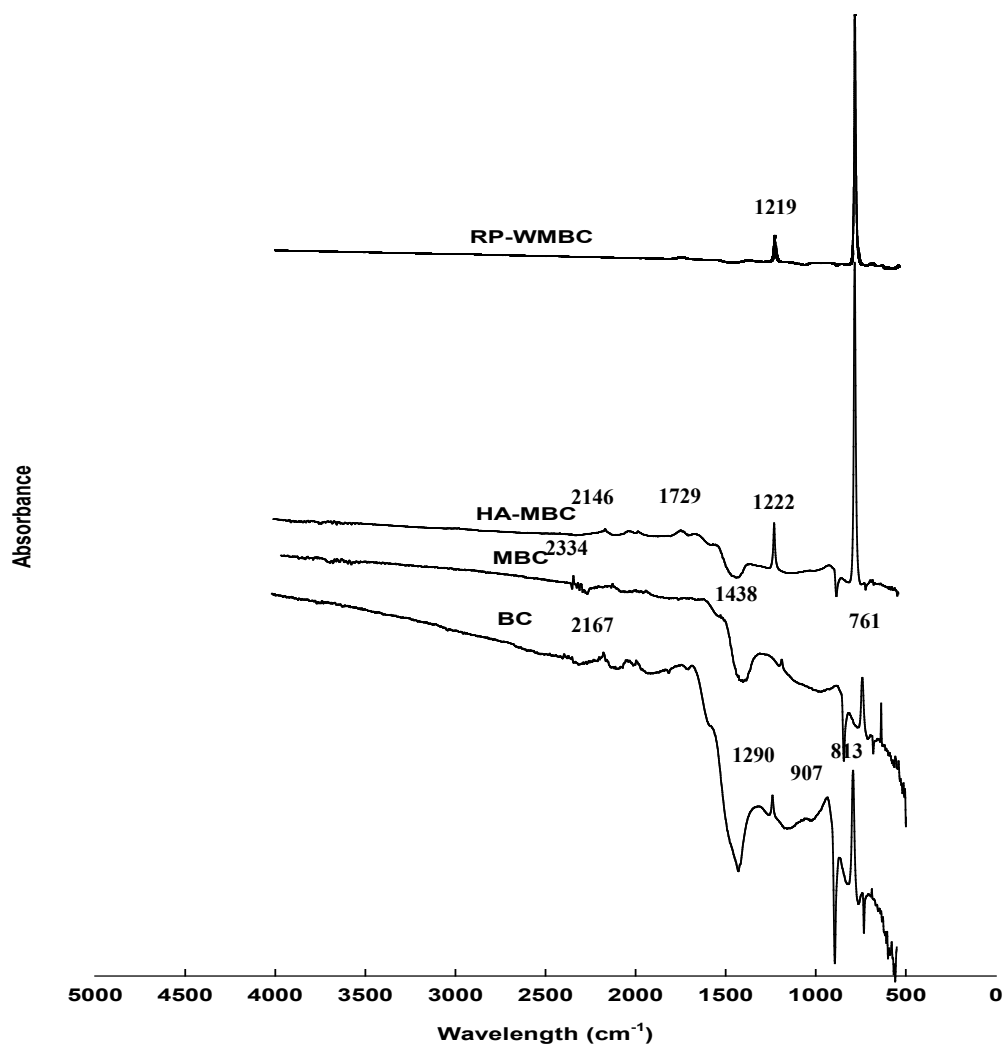

**Figure S1.** FTIR spectra of conocarpus biochar and its un-milled, milled and modified derivatives.

BC = Biochar, MBC = Ball milled biochar, HA-MBC = Humic acid modified ball milled biochar, RP-WMBC = Rock phosphate modified ball milled biochar with water.

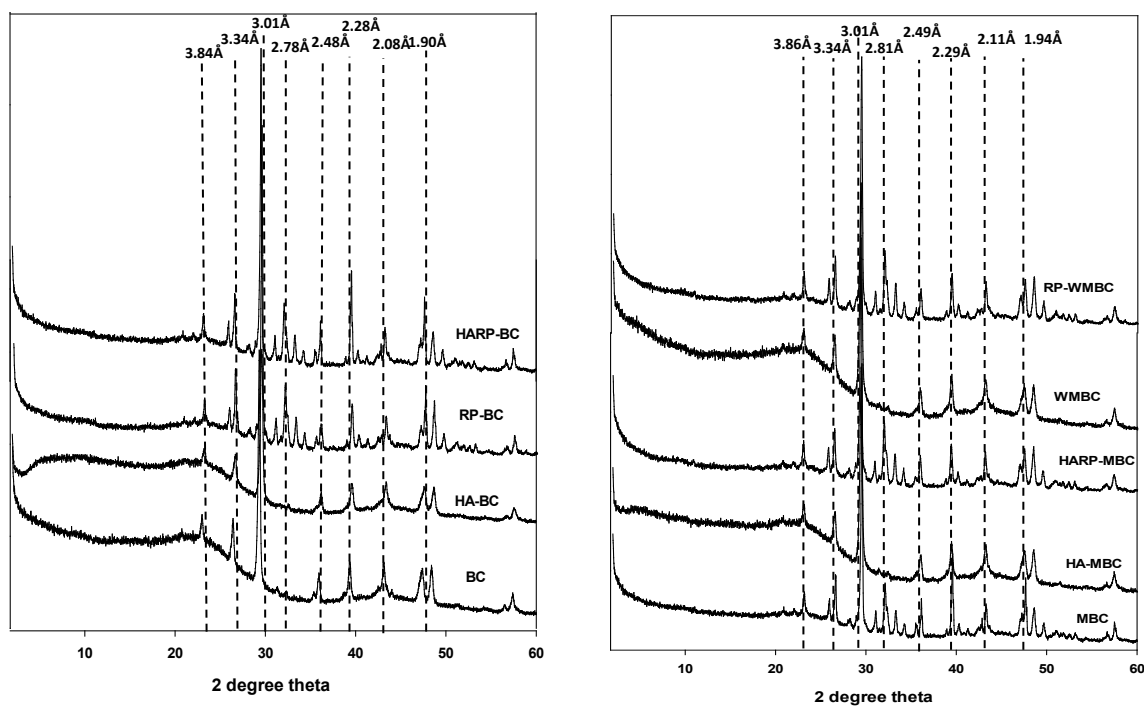

**Figure S2.** XRD spectra of conocarpus biochar and its un-milled, milled and modified derivatives. BC = Biochar, HA-BC = Humic acid modified biochar, RP-BC = Rock phosphate modified biochar, HARP-BC = Humic acid and rock phosphate modified biochar, MBC = Ball milled biochar, HA-MBC = Hum acid modified ball milled biochar, HARP-MBC = Humic acid and rock phosphate modified ball milled biochar, WMBC= Ball milled biochar with water RP-WMBC = Rock phosphate modified ball milled biochar with water.

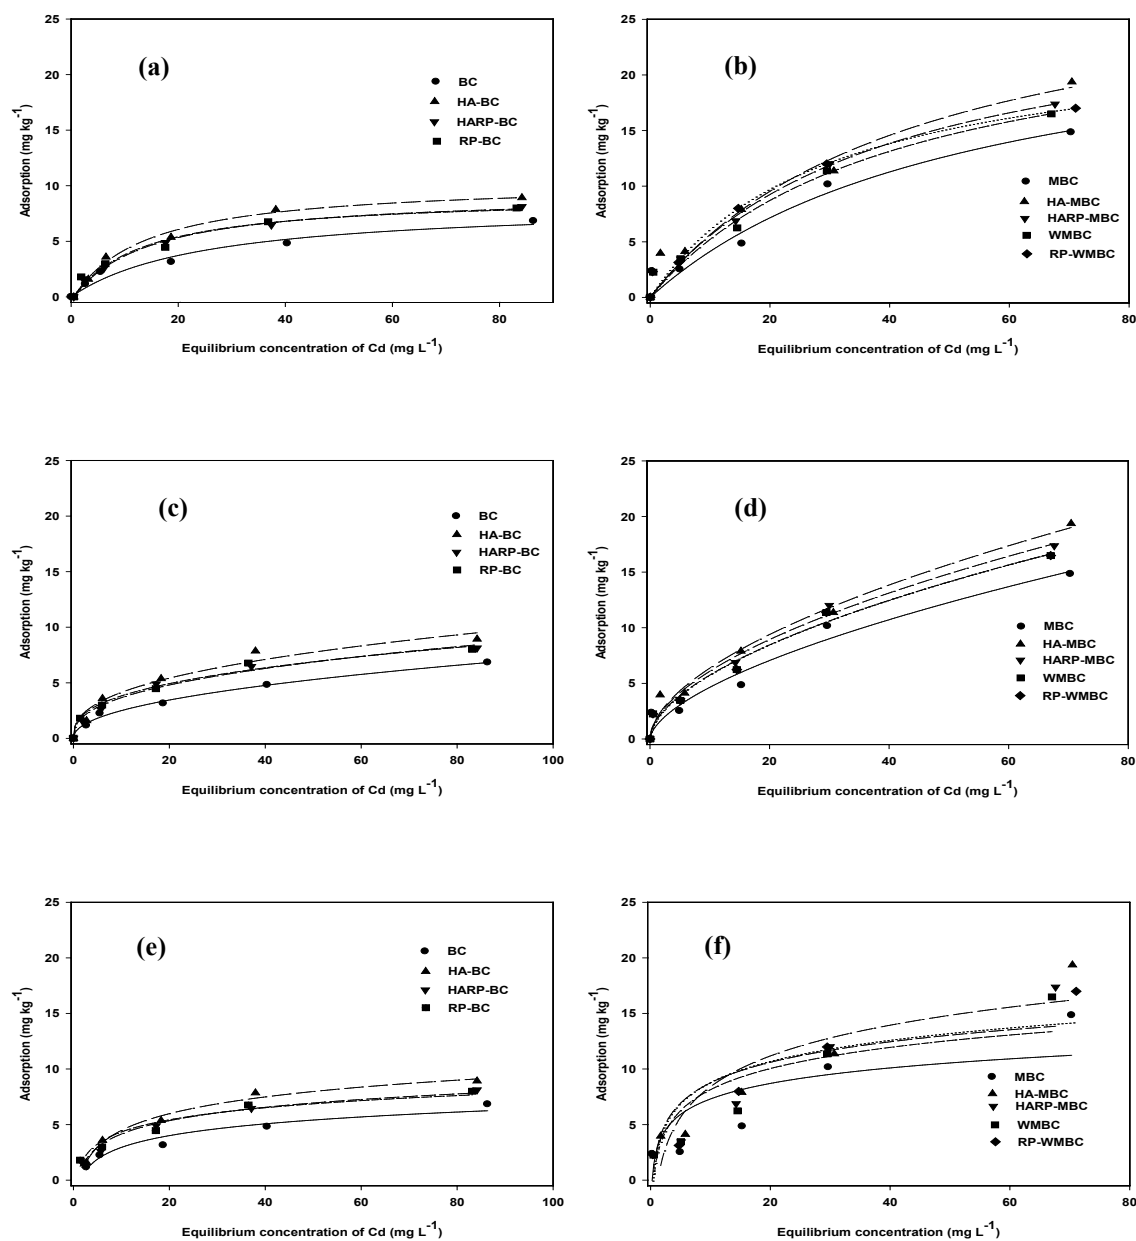

**Figure S3.** Langmuir(a-b), Freundlich (c-d) and Temkin (e-f) adsorption isotherms of Cd by (a) un-milled adsorbents and (b) milled adsorbents.

BC = Biochar, HA-BC = Humic acid modified biochar, HARP-BC = Humic acid and rock phosphate modified biochar, RP-BC = Rock phosphate modified biochar, MBC = Ball milled biochar, HA-MBC = Humic acid modified ball milled biochar, HARP-MBC = Humic acid and rock phosphate modified ball milled biochar, WMBC= Ball milled biochar with water, RP-WMBC = Rock phosphate modified ball milled biochar with water.

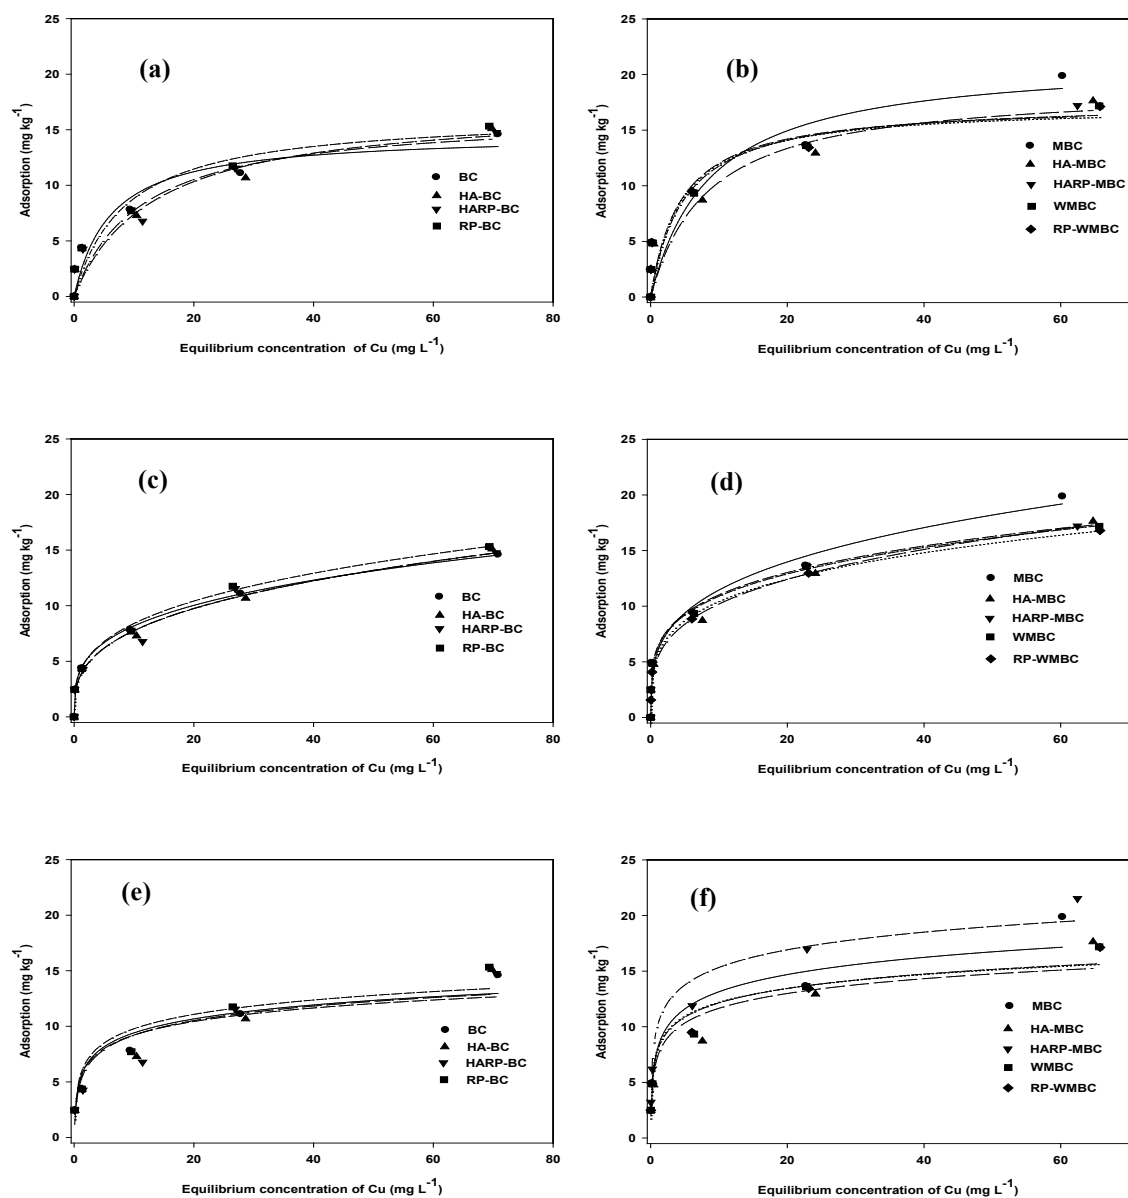

**Figure S4.** Langmuir(a-b), Freundlich (c-d) and Temkin (e-f) adsorption isotherms of Cu by (a) un-milled adsorbents and (b) milled adsorbents.

BC = Biochar, HA-BC = Humic acid modified biochar, HARP-BC = Humic acid and rock phosphate modified biochar, RP-BC = Rock phosphate modified biochar, MBC = Ball milled biochar, HA-MBC = Humic acid modified ball milled biochar, HARP-MBC = Humic acid and rock phosphate modified ball milled biochar, WMBC= Ball milled biochar with water, RP-WMBC = Rock phosphate modified ball milled biochar with water.

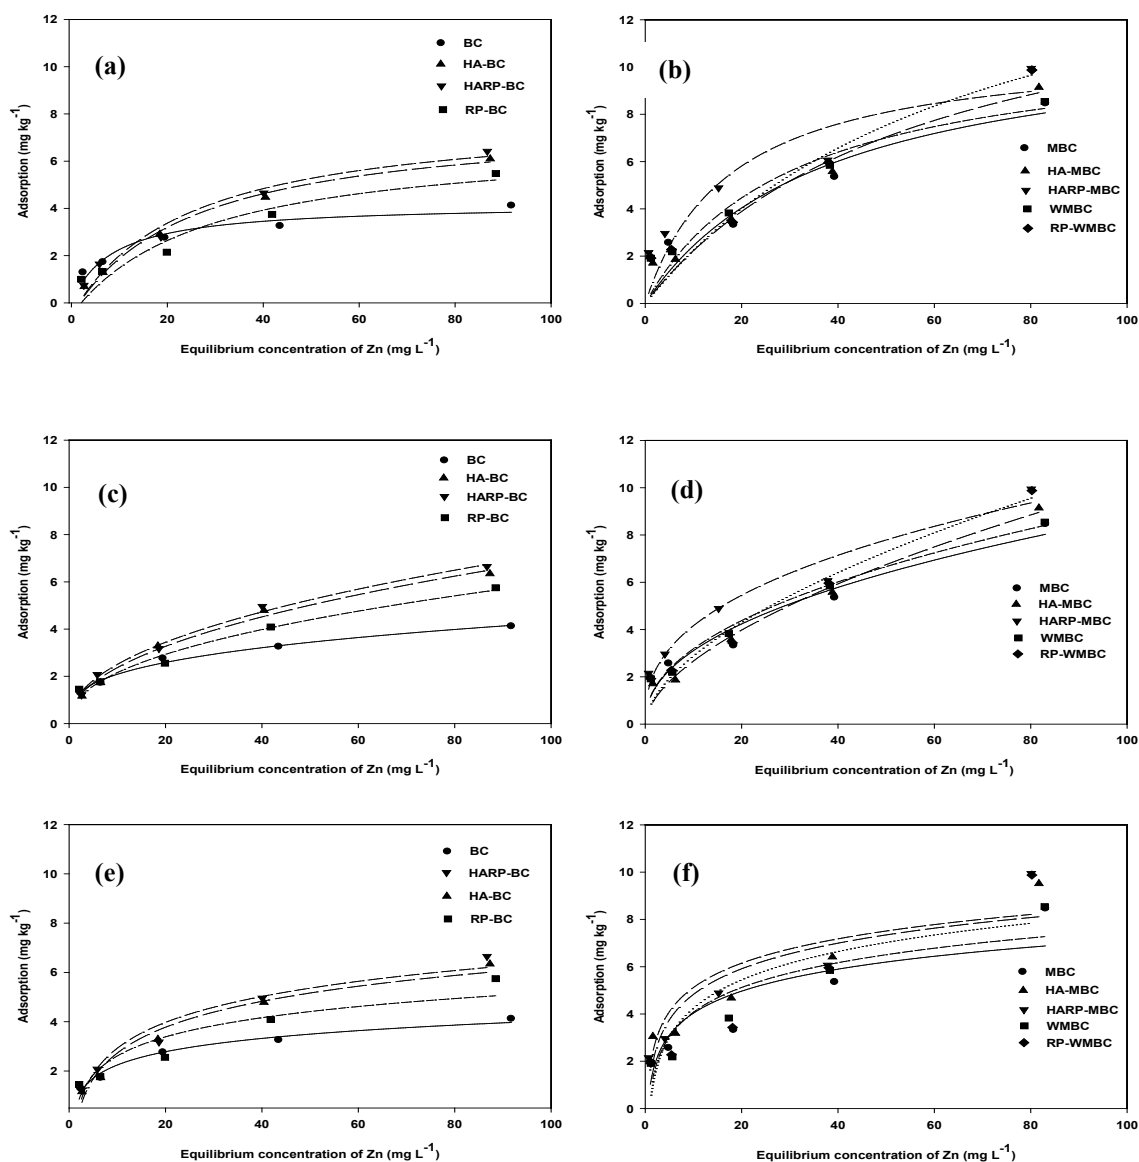

**Figure S5.** Langmuir (a-b), Freundlich (c-d) and Temkin (e-f) adsorption isotherms of Zn by (a) un-milled adsorbents and (b) milled adsorbents.

BC = Biochar, HA-BC = Humic acid modified biochar, HARP-BC = Humic acid and rock phosphate modified biochar, RP-BC = Rock phosphate modified biochar, MBC = Ball milled biochar, HA-MBC = Humic acid modified ball milled biochar, HARP-MBC = Humic acid and rock phosphate modified ball milled biochar, WMBC = Ball milled biochar with water, RP-WMBC = Rock phosphate modified ball milled biochar with water.

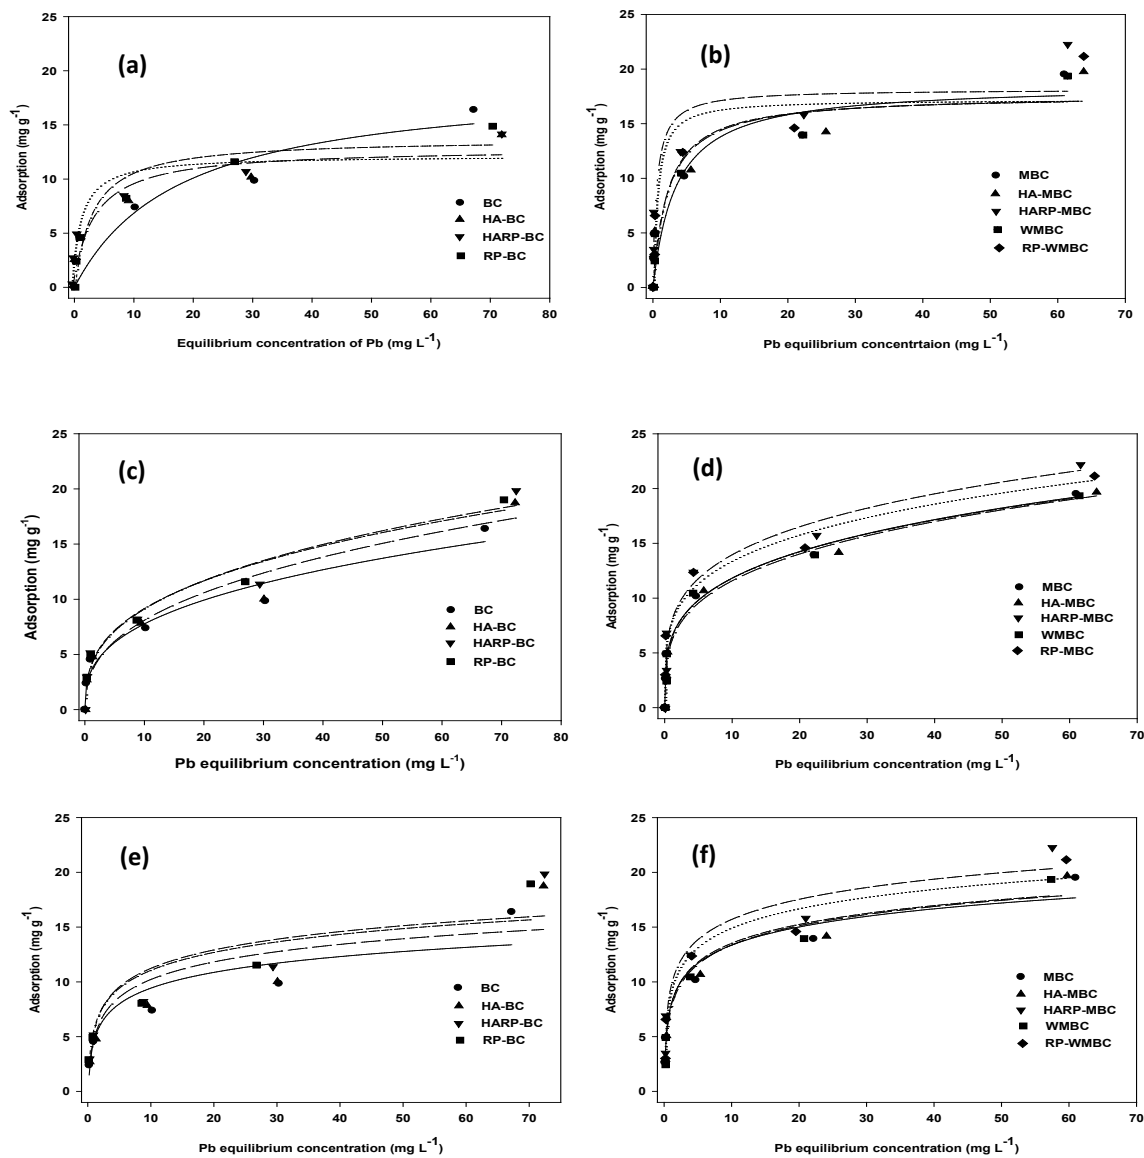

**Figure S6.** Adsorption isotherms of Pb by conocarpus derived biochar, its modified and milled derivatives. Fig. 2 a, b (Langmuir), c, d (Freundlich) and e, f (Temkin). BC = Biochar, HA-BC = Humic acid modified biochar, RP-BC = Rock phosphate modified biochar, HARP-BC = Humic acid and rock phosphate modified biochar, MBC = Ball milled biochar, HA-MBC = Humic acid modified ball milled biochar, HARP-MBC = Humic acid and rock phosphate modified ball milled biochar, WMBC= Ball milled biochar with water RP-WMBC = Rock phosphate modified ball milled biochar with water.
